# Supplementary material for: Selective Passivation of Three-Dimensional Carbon Microelectrodes by Polydopamine Electrodeposition and Local Laser Ablation
Source: MDPI journal article supplement (doi:10.3390/mi13030371), 2022-02-26
Supplement: s1 [file s1]

# Supplementary Materials: Selective Passivation of Three-Dimensional Carbon Microelectrodes by Polypyrrole Electrodeposition and Local Laser Ablation

Babak Rezaei <sup>\*,†</sup>, Saloua Saghir <sup>†</sup>, Jesper Yue Pan, Rasmus Schmidt Davidsen and Stephan Sylvest Keller

National Centre for Nano Fabrication and Characterization, DTU Nanolab, Technical University of Denmark, 2800 Konges Lyngby, Denmark; saghir.saloua@gmail.com (S.S.); jesyup@dtu.dk (J.Y.P.); rasda@dtu.dk (R.S.D.); suke@dtu.dk (S.S.K.)

\* Correspondence: barez@dtu.dk; Tel.: +45-31863250

† These authors have contributed equally to this work and should be considered co-first authors.

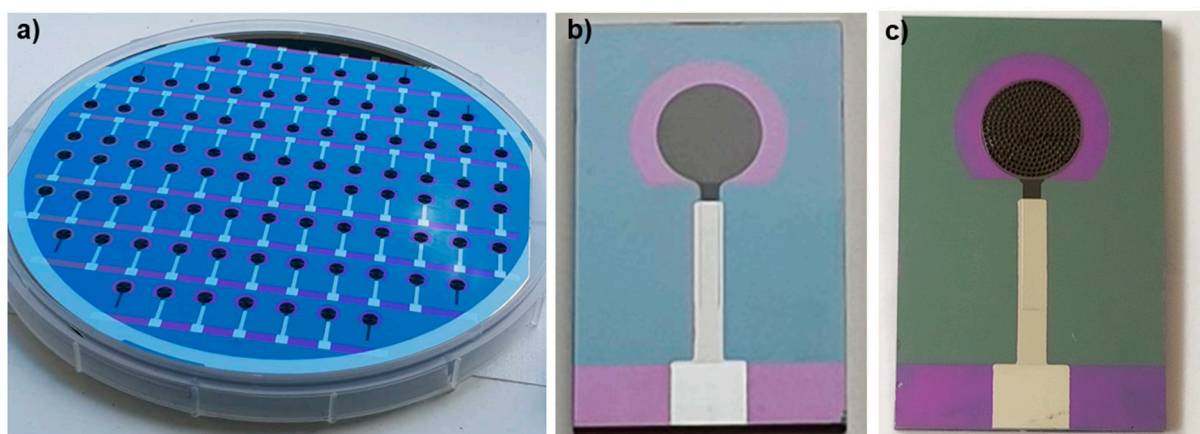

**Figure S1.** Photographs of (a) 6 inch wafer containing the 3D carbon micropillar electrodes; (b) 2D single chip and (c) 3D single chip with 12.6 mm<sup>2</sup> footprint area containing the 284 pyrolytic carbon micropillars.

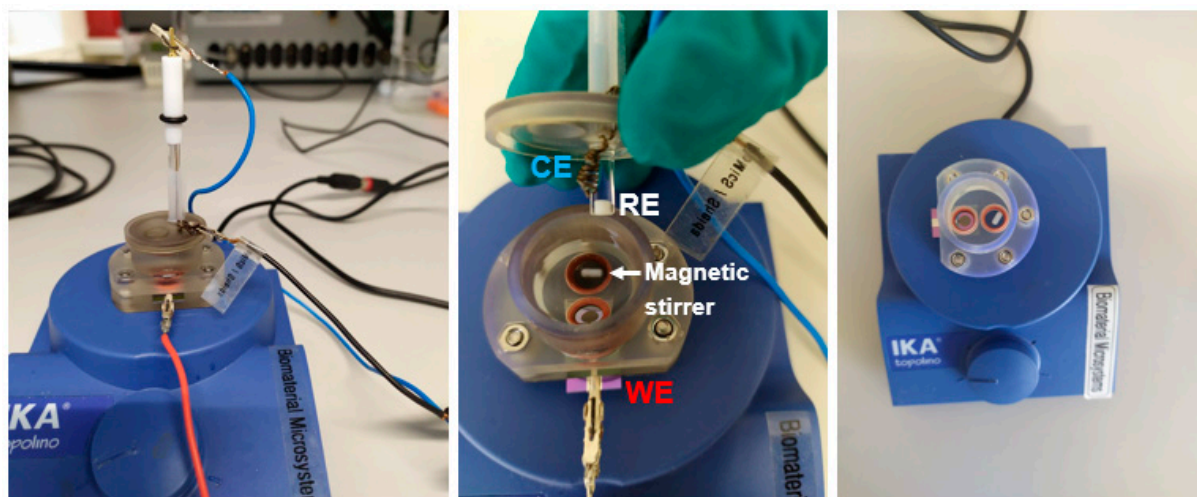

**Figure S2.** Top and side view photographs of the custom-made electrochemical cell with three electrodes arrangement. RE: reference electrode; CE: counter electrode; WE: working electrode.

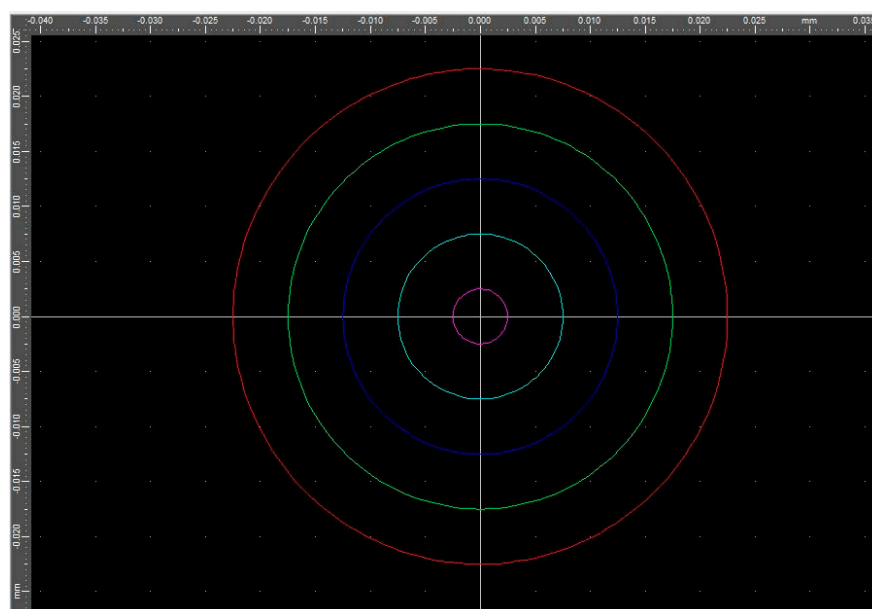

**Figure S3.** Schematic illustration of the laser pattern utilized for removing the PDA coating layer from the tip of a micropillar.
